# Supplementary material for: Seed Coating with Biowaste Materials and Biocides—Environment-Friendly Biostimulation or Threat?
Source: MDPI journal article supplement (doi:10.3390/agronomy11061034), 2021-05-21
Supplement: s1 [file s1]

**Table S1.** Properties of soil used for plant cultivation. The analysis were performed according to the Polish standards and procedures.

| Attribute                                      | Value | Analytical Method              | Analytical Procedure           |
|------------------------------------------------|-------|--------------------------------|--------------------------------|
| Acidity in KCl (pH)                            | 5.7   | potentiometric                 | PN-ISO 10390:1997              |
| Organic matter [%]                             | 77.3  | weight                         | PB 30 ed. 3 (10 May 2013)      |
| Total N [%]                                    | 2.57  | titrimetric (Kjeldahl method)  | PB 49 ed. 2 (1 February 2007)  |
| Available nutrients [mg kg <sup>-1</sup> soil] |       |                                |                                |
| P (P <sub>2</sub> O <sub>5</sub> )             | 892   | spectrophotometric             | PN-R-04023:1996                |
| K (K <sub>2</sub> O)                           | 675   | atomic emission spectroscopy   | PN-R-04022:1996+Az1:2002       |
| Mg                                             | 754   | atomic absorption spectroscopy | PN-R-04020:1994+Az 1:2004 p. 4 |
| Mn                                             | 139   | atomic absorption spectroscopy | PB 25 ed. 1 (14 June 2004)     |
| Cu                                             | <2.5  | atomic absorption spectroscopy | PB 25 ed. 1 (14 June 2004)     |
| Zn                                             | 11.1  | atomic absorption spectroscopy | PB 25 ed. 1 (14 June 2004)     |
| Fe                                             | 5438  | atomic absorption spectroscopy | PN-R-04021:1994 p. 4           |
| Ca                                             | 2255  | atomic emission spectroscopy   | PB 04 ed. 2 (1 March 2019)     |
| Na                                             | 62.8  | atomic emission spectroscopy   | PB 04 ed. 2 (1 March 2019)     |
| B                                              | 4.21  | spectrophotometric             | PN-R-04018:1993 p. 4           |
| Contaminants [mg kg <sup>-1</sup> soil]        |       |                                |                                |
| Cr                                             | <5.0  | atomic absorption spectroscopy | PB 21 ed. 4 (1 March 2018)     |
| Ni                                             | <4.0  | atomic absorption spectroscopy | PB 21 ed. 4 (1 March 2018)     |

**Table S2.** Parameters derived from the OJIP transient used in this study, formulas of their calculation and definitions. The descriptions of parameters follows Wala et al. (2020).

| OJIP parameter                    | Definition                                                                               |
|-----------------------------------|------------------------------------------------------------------------------------------|
| F <sub>0</sub> (=F <sub>O</sub> ) | Fluorescence intensity at O-step (at 50 μs) (=Minimal fluorescence intensity)            |
| F <sub>J</sub>                    | Fluorescence intensity at J-step (at 2 ms)                                               |
| F <sub>I</sub>                    | Fluorescence intensity at I-step (at 60 ms)                                              |
| F <sub>M</sub> (=F <sub>P</sub> ) | Fluorescence intensity at P-step (at 1000 μs) (=Maximal fluorescence intensity)          |
| F <sub>V</sub>                    | Maximal variable fluorescence                                                            |
| V <sub>J</sub>                    | Relative variable fluorescence at J-step (2 ms)                                          |
| V <sub>I</sub>                    | Relative variable fluorescence at I-step (60 ms)                                         |
| F <sub>V</sub> /F <sub>M</sub>    | Maximum quantum yield of primary PSII photochemistry                                     |
| M <sub>0</sub>                    | Approximated initial slope of the fluorescent transient                                  |
| Area                              | Area between fluorescence curve and F <sub>M</sub> (background subtracted)               |
| S <sub>M</sub>                    | Standardized area above the fluorescence curve between F <sub>0</sub> and F <sub>M</sub> |
| N                                 | Number of Q <sub>A</sub> redox turnovers until F <sub>M</sub> is reached                 |
| φ <sub>E0</sub>                   | Quantum yield for electron transport from Q <sub>A</sub> to plastoquinone at t = 0       |
| PI <sub>ABS</sub>                 | Performance index of electron flux from PSII based to intersystem acceptors              |
| ABS/RC                            | Photon flux absorbed by PSII antenna chlorophyll per RC at t = 0                         |
| TR <sub>0</sub> /RC               | Trapping flux leading to Q <sub>A</sub> reduction per RC at t = 0                        |
| ET <sub>0</sub> /RC               | Electron transport flux per RC at t = 0                                                  |
| DI <sub>0</sub> /RC               | Dissipated energy flux per RC at t = 0                                                   |

**Table S3.** Results of two-way ANOVA (F values) examining the effects of the studied factors on measured traits of *Pisum sativum* L. plants subjected to different seed coating treatments.

| Measured Trait                 | (BA) Binding Agent <sup>a</sup><br>(df = 3) | Studied factor<br>(D) Dolomite <sup>b</sup><br>(df = 1) | BA x D<br>(df = 3) |
|--------------------------------|---------------------------------------------|---------------------------------------------------------|--------------------|
| <b>Growth-related</b>          |                                             |                                                         |                    |
| Root FW                        | 1.5 ns                                      | 52.5 ***                                                | 0.6 ns             |
| Shoot FW                       | 2.3 ns                                      | 61.3 ***                                                | 0.8 ns             |
| Root DW                        | 1.8 ns                                      | 43.6 ***                                                | 0.7 ns             |
| Shoot DW                       | 2.2 ns                                      | 53.3 ***                                                | 0.7 ns             |
| Shoot:Root FW ratio            | 0.2 ns                                      | 0.1 ns                                                  | 1.9 ns             |
| Shoot:Root DW ratio            | 0.1 ns                                      | 0.0 ns                                                  | 1.0 ns             |
| RGR 9-14 d                     | 15.4 ***                                    | 0.9 ns                                                  | 3.3 *              |
| RGR 14-21 d                    | 5.1 **                                      | 0.1 ns                                                  | 3.7 *              |
| <b>Stipule-related</b>         |                                             |                                                         |                    |
| Stipule FW                     | 1.2 ns                                      | 61.4 ***                                                | 1.0 ns             |
| Stipule DW                     | 0.1 ns                                      | 35.6 ***                                                | 1.9 ns             |
| Stipulearea                    | 1.3 ns                                      | 55.2 ***                                                | 1.1 ns             |
| SLA                            | 2.9 ns                                      | 2.6 ns                                                  | 1.5 ns             |
| Chlorophyllcontent             | 4.21 *                                      | 2.1 ns                                                  | 7.5 **             |
| F <sub>v</sub> /F <sub>m</sub> | 12.5 ***                                    | 0.6 ns                                                  | 2.9 *              |
| <b>Root element content</b>    |                                             |                                                         |                    |
| Al                             | 0.6 ns                                      | 0.8 ns                                                  | 5.3 **             |
| Ca                             | 4.2 *                                       | 3.5 ns                                                  | 4.1 **             |
| Cr                             | 1.3 ns                                      | 5.5 ns                                                  | 1.0 ns             |
| Cu                             | 0.4 ns                                      | 3.3 ns                                                  | 2.7 ns             |
| Fe                             | 0.8 ns                                      | 4.4 *                                                   | 4.4 *              |
| K                              | 1.8 ns                                      | 13.7 ***                                                | 7.5 ***            |
| Mg                             | 2.6 ns                                      | 52.5 ***                                                | 3.0 *              |
| Mn                             | 2.6 ns                                      | 3.0 ns                                                  | 13.0 ***           |
| Mo                             | 2.8 ns                                      | 1.6 ns                                                  | 1.8 ns             |
| Na                             | 4.7 *                                       | 32.3 ***                                                | 13.1 ***           |
| Ni                             | 0.7 ns                                      | 2.8 ns                                                  | 0.2 ns             |
| Sn                             | 9.8 ***                                     | 0.5 na                                                  | 0.5 ns             |
| Sr                             | 10.8 ***                                    | 37.9 ***                                                | 8.9 ***            |
| Ti                             | 4.3 *                                       | 3.6 ns                                                  | 5.1 ***            |
| Zn                             | 14.6 ***                                    | 1.5 ns                                                  | 0.5 ns             |
| <b>Shoot element content</b>   |                                             |                                                         |                    |
| Al                             | 4.2 *                                       | 2.3 ns                                                  | 4.3 ns             |
| Ca                             | 1.2 ns                                      | 0.0 ns                                                  | 0.2 ns             |
| Cr                             | 6.6 ***                                     | 0.3 ns                                                  | 0.9 ns             |
| Cu                             | 3.1 *                                       | 4.5 *                                                   | 0.7 ns             |
| Fe                             | 1.3 ns                                      | 0.6 ns                                                  | 0.5 ns             |
| K                              | 1.8 ns                                      | 6.1 *                                                   | 1.3 ns             |
| Mg                             | 0.7 ns                                      | 0.2 ns                                                  | 0.5 ns             |
| Mn                             | 0.8 ns                                      | 0.3 ns                                                  | 0.8 ns             |
| Mo                             | 3.6 *                                       | 5.4 *                                                   | 0.9 ns             |
| Na                             | 7.5 ***                                     | 1.2 ns                                                  | 1.1 ns             |
| Ni                             | 0.3 ns                                      | 0.0 ns                                                  | 1.2 ns             |
| Sn                             | 50.3 ***                                    | 0.6 ns                                                  | 0.6 ns             |
| Sr                             | 1.8 ns                                      | 0.5 ns                                                  | 0.3 ns             |
| Ti                             | 5.3 **                                      | 1.1 ns                                                  | 1.0 ns             |
| Zn                             | 5.0 **                                      | 9.2 **                                                  | 1.1 ns             |

<sup>a</sup>bound by water, bovine collagen, fish collagen of PHMB; <sup>b</sup>with or without addition of dolomite dust. \* p < 0.05;

\*\* p < 0.01; \*\*\* p < 0.005; ns—not significant (p > 0.05).

**Table S4.** Results of three-way ANOVA (F values) examining the effects of the studied factors on final emergence percentage (FEP), index of emergence velocity (IEV) and index of emergence synchrony (IES) of *Pisum sativum* L. seeds subjected to different seed coating treatments.

| Studied Factor                  | df | Measurement |          |          |
|---------------------------------|----|-------------|----------|----------|
|                                 |    | FEP         | IEV      | IES      |
| (BD) Burial Depth <sup>a</sup>  | 3  | 23.4 ***    | 42.2 *** | 55.3 *** |
| (BA) Binding Agent <sup>b</sup> | 3  | 1.4 ns      | 2.2 ns   | 3.0 *    |
| (D) Dolomite <sup>c</sup>       | 1  | 7.2 **      | 11.3 **  | 14.1 *** |
| BD × BA                         | 9  | 0.6 ns      | 0.9 ns   | 2.6 **   |
| BD × D                          | 3  | 0.8 ns      | 1.1 ns   | 1.1 ns   |
| BA × D                          | 3  | 1.5 ns      | 2.8 *    | 5.9 ***  |
| BD × BA × D                     | 9  | 0.4 ns      | 0.7 ns   | 0.9 ns   |

<sup>a</sup> depth of 0, 2, 4 or 6 cm; <sup>b</sup> bound by water, bovine collagen, fish collagen or PHMB; <sup>c</sup> with or without addition of dolomite dust. \*  $p < 0.05$ ; \*\*  $p < 0.01$ ; \*\*\*  $p < 0.005$ ; ns—not significant ( $p > 0.05$ ).

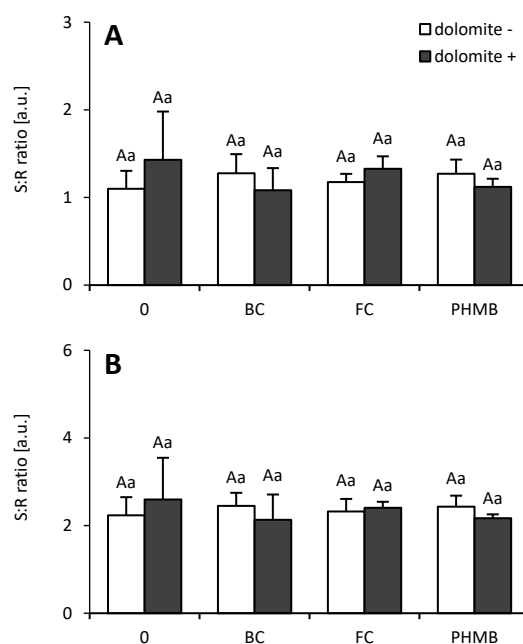

**Figure S1.** Fresh weight (A) and dry weight (B) shoot:root (S:R) ratio of *Pisum sativum* L. plants subjected to different seed coating treatments. Values followed by different upper-case letters within the given binding agent treatment (0, BC, FC or PHMB) are significantly different ( $p < 0.05$ ); Student's test ( $n = 4$ ). Values followed by different lower-case letters within the given dolomite treatment (dolomite - or dolomite +) are significantly different ( $p < 0.05$ ); ANOVA followed by Tukey's post-hoc test ( $n = 4$ ).

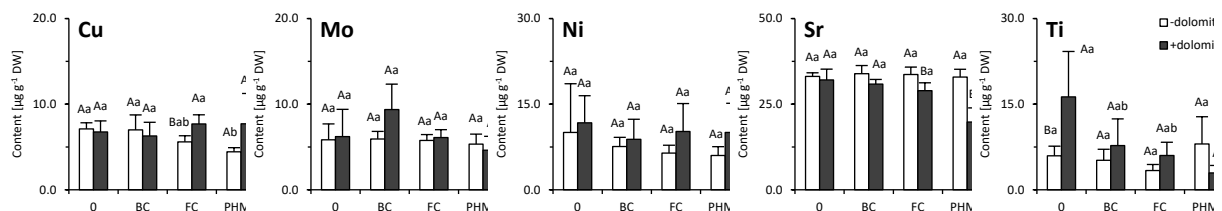

**Figure S2.** Elemental composition (Cu, Mo, Ni, Sr, Ti) of roots of *Pisum sativum* L. plants subjected to different seed coating treatments. Values followed by different upper-case letters within the given binding agent treatment (0, BC, FC or PHMB) are significantly different ( $p < 0.05$ ); Student's test ( $n = 4$ ). Values followed by different lower-case letters within the given dolomite treatment (dolomite - or dolomite +) are significantly different ( $p < 0.05$ ); ANOVA followed by Tukey's post-hoc test ( $n = 4$ ).

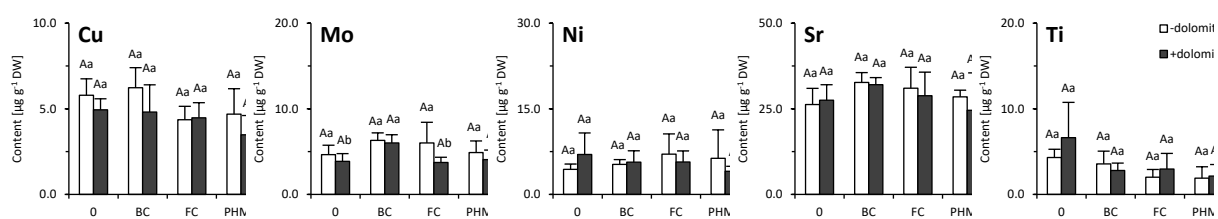

**Figure S3.** Elemental composition (Cu, Mo, Ni, Sr, Ti) of shoots of *Pisum sativum* L. plants subjected to different seed coating treatments. Values followed by different upper-case letters within the given binding agent treatment (0, BC, FC or PHMB) are significantly different ( $p < 0.05$ ); Student's test ( $n = 4$ ). Values followed by different lower-case letters within the given dolomite treatment (dolomite - or dolomite +) are significantly different ( $p < 0.05$ ); ANOVA followed by Tukey's post-hoc test ( $n = 4$ ).
